# Supplementary material for: Observations of tropospheric HONO are incompatible with understanding of atmospheric chemistry
Source: Copernicus journal article supplement (doi:10.5194/egusphere-2025-830), 2025-02-26

## Supplementary information

**Table S1.** Summary of key terms for atmospheric nitrogen in the three simulations.

|                                                                       | No pNO <sub>3</sub> <sup>-</sup> + hv | Shah et al. 2023 | This study |
|-----------------------------------------------------------------------|---------------------------------------|------------------|------------|
| <b>Emissions (TgN yr<sup>-1</sup>)</b>                                |                                       |                  |            |
| Total NO <sub>x</sub>                                                 | 53.98                                 | 53.80            | 53.46      |
| Anthropogenic NO <sub>x</sub>                                         | 30.86                                 | 30.86            | 30.86      |
| Soil NO <sub>x</sub>                                                  | 7.52                                  | 7.52             | 7.52       |
| Biomass Burning NO <sub>x</sub>                                       | 6.67                                  | 6.67             | 6.67       |
| Lightning NO <sub>x</sub>                                             | 6.13                                  | 6.13             | 6.13       |
| Shipping NO <sub>x</sub>                                              | 2.80                                  | 2.62             | 2.32       |
| Shipping HNO <sub>3</sub>                                             | 3.09                                  | 3.26             | 2.21       |
| <b>Deposition (TgN yr<sup>-1</sup>)</b>                               |                                       |                  |            |
| HNO <sub>3</sub>                                                      | 35.20                                 | 37.62            | 36.09      |
| pNO <sub>3</sub>                                                      | 15.37                                 | 12.53            | 12.71      |
| PAN                                                                   | 1.26                                  | 1.38             | 2.32       |
| NO <sub>2</sub>                                                       | 1.73                                  | 1.76             | 1.67       |
| XNO <sub>2</sub> / XNO <sub>3</sub>                                   | 0.29                                  | 0.33             | 0.38       |
| HONO                                                                  | 0.07                                  | 0.14             | 0.20       |
| <b>Photolysis Reactions (s<sup>-1</sup>)</b>                          |                                       |                  |            |
| pNO <sub>3</sub> + hv → HONO                                          | 0.00                                  | 7.96             | 32.89      |
| pNO <sub>3</sub> + hv → NO <sub>2</sub>                               | 0.00                                  | 3.98             | 16.44      |
| HONO + hv → OH + NO                                                   | 16.90                                 | 27.89            | 68.05      |
| HNO <sub>3</sub> + hv → OH + NO <sub>2</sub>                          | 2.07                                  | 2.14             | 1.81       |
| <b>Gas-Phase Reactions (TgN yr<sup>-1</sup>)</b>                      |                                       |                  |            |
| OH + NO → HONO                                                        | 17.05                                 | 20.32            | 36.20      |
| OH + NO <sub>2</sub> → HNO <sub>3</sub>                               | 27.13                                 | 34.49            | 59.73      |
| NO <sub>2</sub> + MCO <sub>3</sub> → PAN                              | 117.57                                | 133.84           | 150.17     |
| PAN → NO <sub>2</sub> + MCO <sub>3</sub>                              | 114.69                                | 130.67           | 145.21     |
| HNO <sub>3</sub> + OH → NO <sub>3</sub>                               | 3.44                                  | 3.85             | 3.84       |
| HNO <sub>2</sub> + OH → H <sub>2</sub> O + NO <sub>2</sub>            | 0.19                                  | 0.37             | 0.98       |
| O <sub>3</sub> + NO <sub>2</sub> → NO <sub>3</sub> + O <sub>2</sub>   | 41.53                                 | 49.07            | 67.31      |
| <b>Heterogeneous Reactions (TgN yr<sup>-1</sup>)</b>                  |                                       |                  |            |
| N <sub>2</sub> O <sub>5</sub> (+ H <sub>2</sub> O) → HNO <sub>3</sub> | 10.08                                 | 11.52            | 16.17      |
| NO <sub>3</sub> → HNO <sub>3</sub>                                    | 2.59                                  | 3.08             | 3.59       |
| NO <sub>2</sub> → HNO <sub>3</sub>                                    | 0.98                                  | 1.06             | 1.07       |
| <b>Tropospheric Burdens (Tg X)</b>                                    |                                       |                  |            |
| O <sub>3</sub>                                                        | 309                                   | 332              | 393        |
| NO <sub>x</sub>                                                       | 0.36                                  | 0.43             | 0.57       |
| HNO <sub>3</sub>                                                      | 1.21                                  |                  | 1.23       |
| pNO <sub>3</sub> <sup>-</sup>                                         | 0.43                                  | 0.38             | 0.30       |
| HONO (Gg)                                                             | 1.64                                  |                  | 6.21       |
| CO                                                                    | 326                                   | 306              | 271        |

**Figure S1.** Location and value in ppt of all available HONO measurements, from aircraft and ship campaigns (coloured by HONO concentration in pptv) and in-situ measurements (red markers).

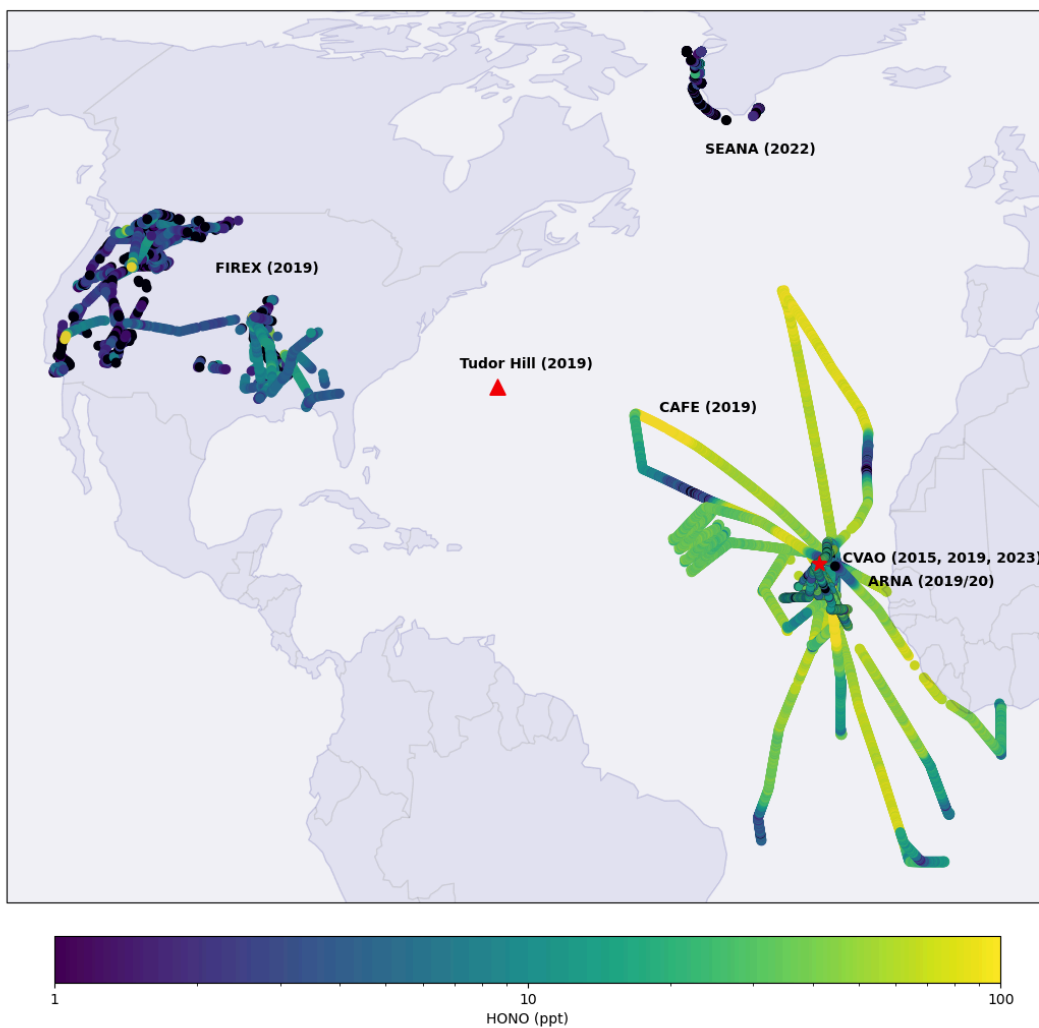

**Figure S2.** Nitrate aerosol photolysis enhancement factor necessary to balance the observed HONO against its photolytic loss as a function of the nitrate aerosol concentration, including parameterisations generated with additional dependencies on RH and Cl (see Methods).

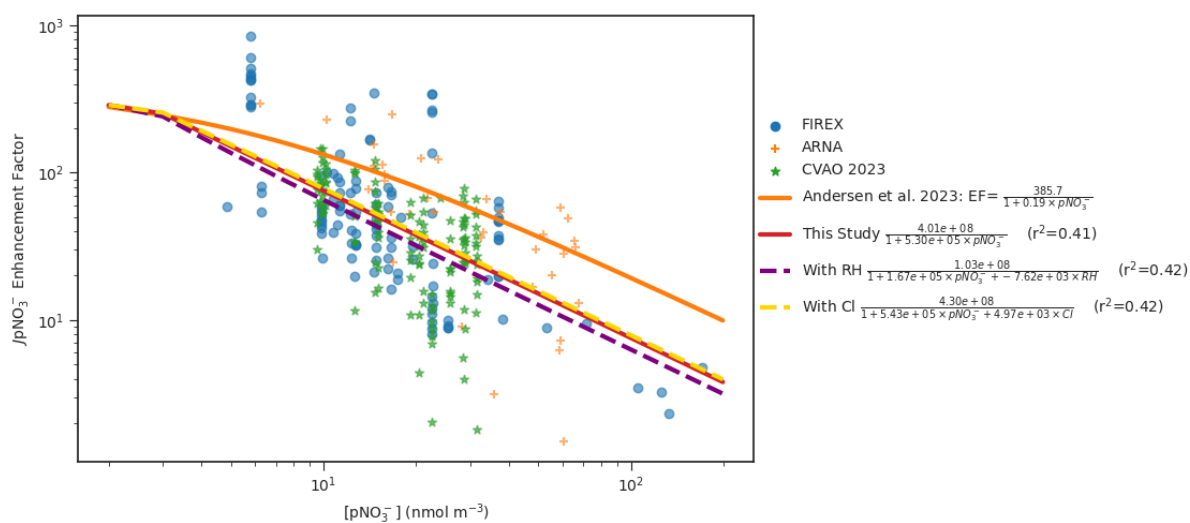

**Figure S3.** Comparison of FIREX-AQ AMS fine-mode nitrate (black) with simulated fine-mode nitrate from the base model version without nitrate photolysis (blue). Data is split into Western and Eastern USA (at -115°W), and averaged over 500m altitude bins. Horizontal grey lines represent 1 standard deviation on the measurements.

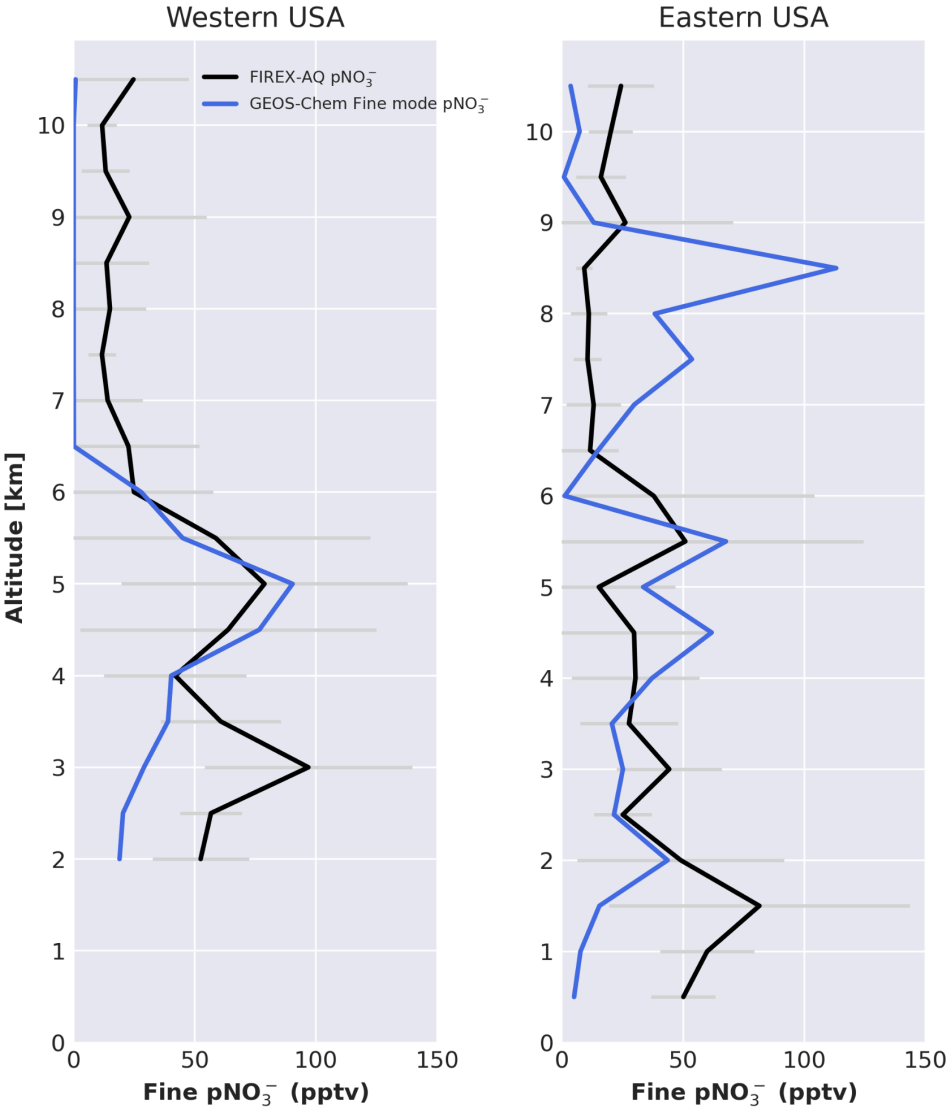

**Figure S4.** Monthly mean O<sub>3</sub> from Global Atmospheric Watch (GAW) sites (black) compared with simulated O<sub>3</sub> from the 3 simulations.

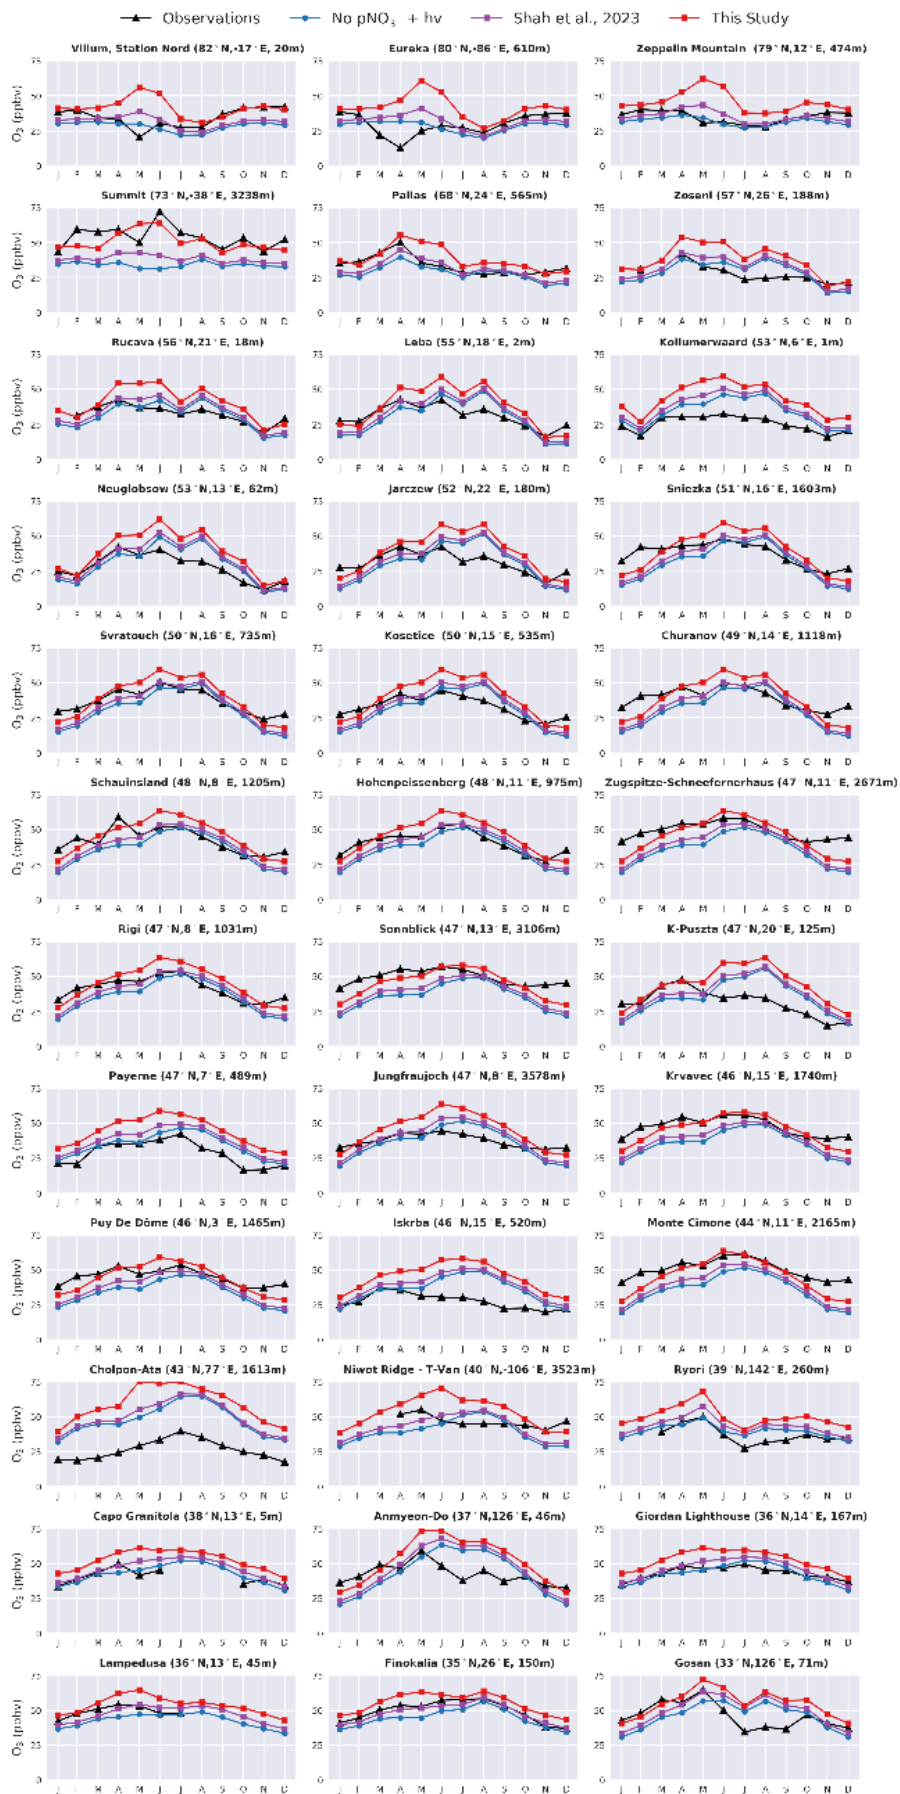

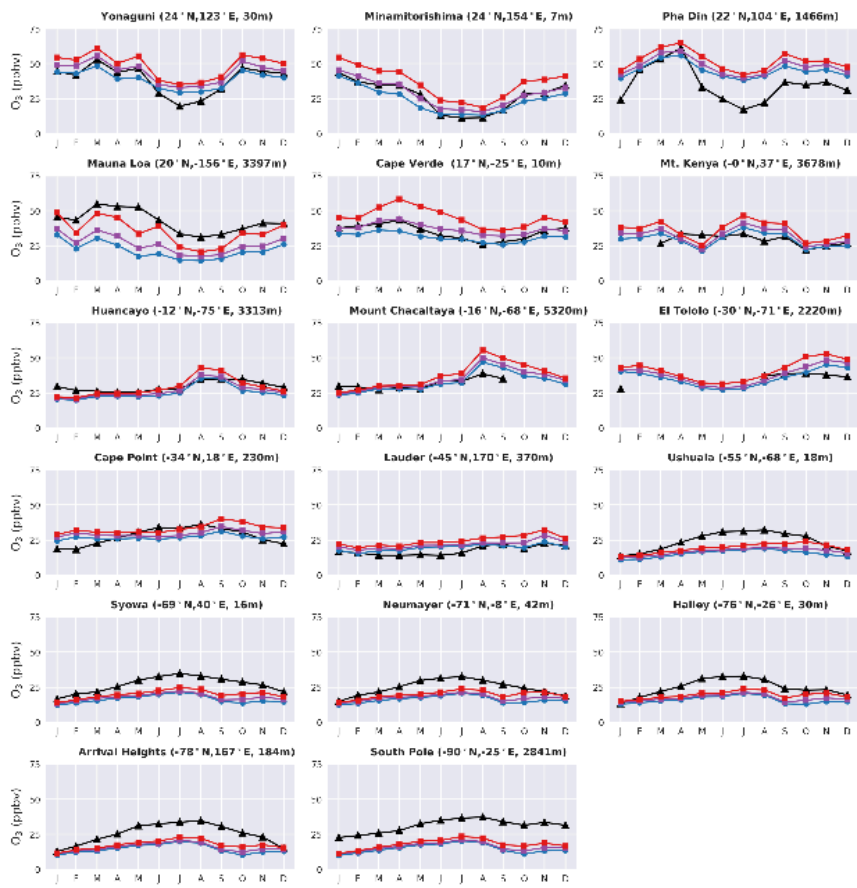

Supplement: Supplementary file 1 [file egusphere-2025-830-supplement.pdf]
